# Supplementary material for: Prospecting the Fine Morphological Characteristics of Urban Streets: How Constitutedness and Permeability Can Sustain Opposite Edges Case Study Approach, Baghdad, Iraq
Source: Research Square preprint supplement (doi:10.21203/rs.3.rs-8719679/v1), 2026-02-09
Supplement: Supplementary file 1 [file 477dbf89a2ac27e7668e36d5.docx]

**Table 1**. Blue one street, the Intervisibility values as (Depth Storey Factor) and the Permeability for each storey of a building.

**Table 2**. Blue two street. The Intervisibility values as (Depth Storey Factor) and the Permeability for each storey of the building.

**Table 3**. Yellow one street. The Intervisibility values as (Depth Storey Factor) and Permeability for each building storey.

Table 4. Yellow two street. The Intervisibility values as (Depth Storey Factor) and the Permeability for each storey of a building.

**Table 5**. Red one street. The Intervisibility values as (Depth Storey Factor) and Permeability for each storey of a building.

**Table 6**. Red two street. The Intervisibility values as (Depth Storey Factor) and Permeability for each storey of a building.

**Table 7**. A table exhibits the six streets of the chosen urban area and number of plots along 100 meters for each selected segment and its two values: Permeability and Constitutedness.
